# Supplementary material
Source: PubMed Central journal article supplement (PMC2703545)
Supplement: en.2008-1362_4.pdf [file en.2008-1362_4.pdf]

## Supplementary Table 1

|                                      | Target Gene       | NCBI<br>Accession No.<br>( <a href="http://www.ncbi.nlm.nih.gov">www.ncbi.nlm.nih.gov</a> )<br>or Reference | Primer Sequence                                                 |
|--------------------------------------|-------------------|-------------------------------------------------------------------------------------------------------------|-----------------------------------------------------------------|
| <b>Genotyping<br/>Primers:</b>       | mGnrhr            | (5, 6)                                                                                                      | Forward TTCGACATCAGAATTAGACTCC<br>Reverse GGGGCATACATAGAGAAGAGC |
|                                      | SV40 TAg          | (7, 8)                                                                                                      | Reverse AGTTTGTCCAATTATGTCCACACC                                |
| <b>Quantitative<br/>PCR Primers:</b> | mActinb           | NM_007393.3                                                                                                 | Forward CTGTATTCCCCTCCATCGTG<br>Reverse GGGTCAGGATACCTCTCTTGC   |
|                                      | mLhb              | NM_008497.2                                                                                                 | Forward CTGAGCCCAAGTGTGGTGTG<br>Reverse GACCATGCTAGGACAGTAGCC   |
|                                      | SV40 large<br>TAg | (18)                                                                                                        | Forward GCAATCGAAGCAGTAGCAATC<br>Reverse CAGCTAATGGACCTTCTAGG   |
|                                      | mFshb             | NM_008045.2                                                                                                 | Forward AGACAGCTGACTGCACAGGA<br>Reverse CCGAGCTGGGTCCTTATACA    |
|                                      | mGnrhr            | NM_010323.1                                                                                                 | Forward TGGTGGTGATTAGCCTGGAC<br>Reverse GATGATGAAGAGGCAGCCGAAG  |
