# Supplementary material
Source: PubMed Central journal article supplement (PMC2703545)

## Supplementary Figure 1.

A

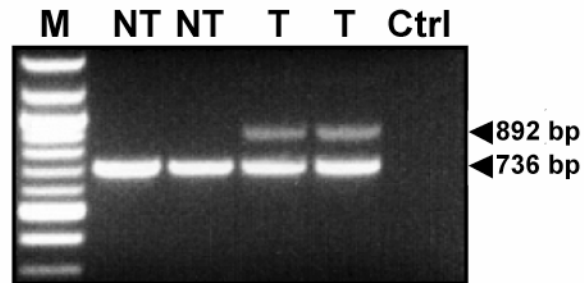

B

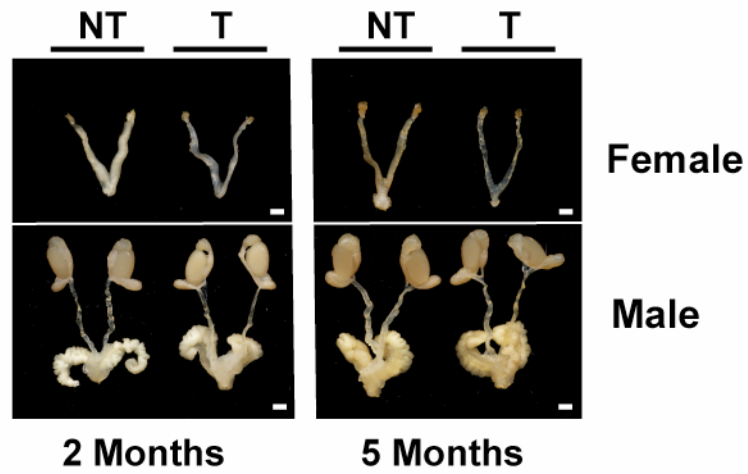

Supplementary Figure 1.

Supplement: en.2008-1362_1.pdf [file en.2008-1362_1.pdf]

## Supplementary Figure 2.

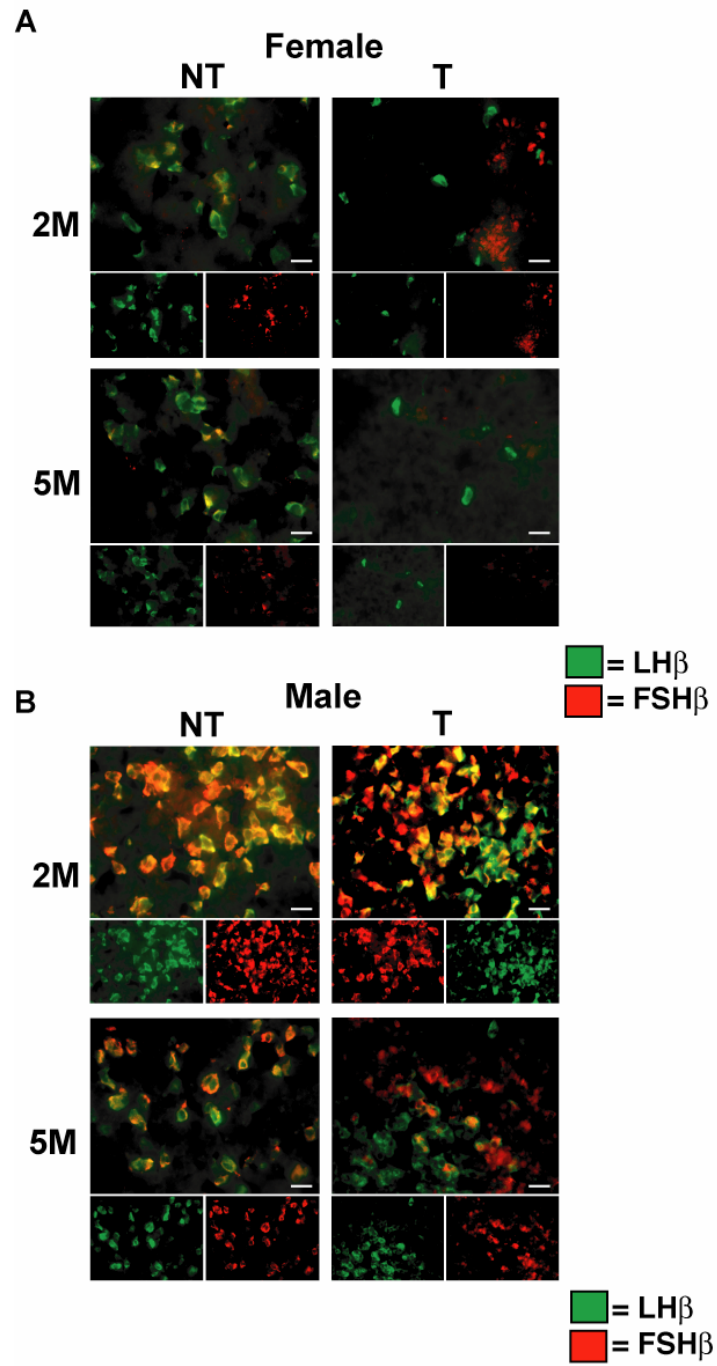

Supplementary Figure 2.

Supplement: en.2008-1362_2.pdf [file en.2008-1362_2.pdf]

### Supplementary Figure 3.

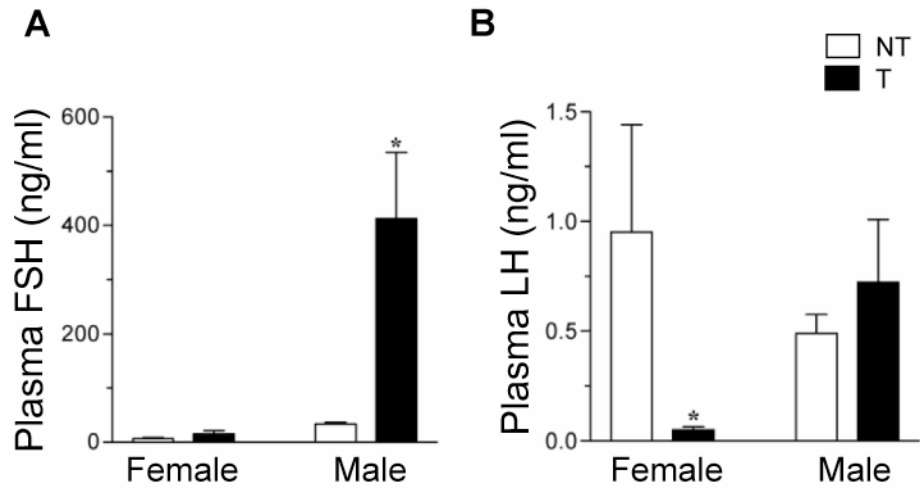

Supplementary Figure 3.

Supplement: en.2008-1362_3.pdf [file en.2008-1362_3.pdf]
